# Supplementary material
Source: publisher figshare collection journal article supplement (https://gsajournals.figshare.com/ndownloader/files/23273477)
Supplement: Supplementary file 1 [file 23273477]

# Ultraconserved non-coding DNA within insect phyla

Thomas Brody<sup>1\*</sup> Amar Yavatkar<sup>2</sup>, Alexander Kuzin<sup>1</sup> and Ward F. Odenwald<sup>1\*</sup>

<sup>1</sup>*Neural Cell-Fate Determinants Section,*

<sup>2</sup>*Division of Intramural Research, Information Technology Program,  
NINDS, NIH, Bethesda, Maryland, USA*

Running title: Ultraconserved sequences in insect enhancers

\*Corresponding authors: Tel: 301-496-3435

E-mail: [brodyt@ninds.nih.gov](mailto:brodyt@ninds.nih.gov),

## Supplemental Table and Figures

**Supplemental Table S1: Ant and Bee species formatted for *EvoPrint* analysis**

| Bee species (superfamily <b>Apoidea</b> )                                                                                                                                                                                                                                                                                                                                                                                       | Ant species (superfamily <b>Formicoidea</b> )                                                                                                                                                                                                                                                                                                                                                                                                                                                                                                                                                                                                                                                                                                                      |
|---------------------------------------------------------------------------------------------------------------------------------------------------------------------------------------------------------------------------------------------------------------------------------------------------------------------------------------------------------------------------------------------------------------------------------|--------------------------------------------------------------------------------------------------------------------------------------------------------------------------------------------------------------------------------------------------------------------------------------------------------------------------------------------------------------------------------------------------------------------------------------------------------------------------------------------------------------------------------------------------------------------------------------------------------------------------------------------------------------------------------------------------------------------------------------------------------------------|
| <b>Apidae</b> – social bees<br><i>Apis mellifera</i> - Western honey bee<br><i>Apis dorsata</i> - Giant honey bee<br><i>Apis florea</i> - Dwarf honey bee<br><br><i>Bombus terrestris</i> - Buff-tailed bumblebee<br><i>Bombus impatiens</i> - Common eastern bumblebee<br><i>Habropoda laboriosa</i> - Southeastern blueberry bee<br><br><b>Megachilidae</b><br><i>Megachile rotundata</i> - alfalfa leafcutter bee – solitary | <b>Myrmicinae</b> –<br><i>Atta cephalotes</i> – Leafcutter ant<br><i>Acromyrmex echinator</i> – Panama leaf-cutting ant<br><i>Wasmannia auropunctata</i> - Little fire ant<br><i>Pogonomyrmex barbatus</i> - Red harvester ant<br><i>Monomorium pharaonis</i> - Pharaoh ant<br><i>Solenopsis invicta</i> – Red fire ant<br><i>Vollenhovia emeryi</i> – Japanese ant<br><i>Cardiocondyla obscurior</i> – a tramp ant<br><br><b>Formicinae</b><br><i>Lasius niger</i> - Black garden ant<br><i>Ooceraea biroi</i> - Army ant – colonial raider ant<br><i>Camponotus floridanus</i> - Florida carpenter ants<br><br><b>Ponerinae</b><br><i>Harpegnathos saltator</i> - Jerdon's jumping ant<br><br><b>Dolichoderinae</b><br><i>Linepithema humile</i> - Argentine Ant |

## Supplemental Figure S1

### vvl-36

|              |         |                                                                  |         |
|--------------|---------|------------------------------------------------------------------|---------|
| <i>Cerat</i> | 455483  | CTAAAACATTTGATGTTAATTGATTTAAACAACCTTTGAACCTGTTGATCTTGCAACAAATTAA | 455534  |
| <i>Droso</i> | 6816217 | CTGGGAGCCGCGAGGTCAATTGATTGAAACAACCTTTGAACCTGTTGATCTTGTCACAAATTAA | 6816279 |
| <i>Musca</i> | 216640  | CTGGGAGCCG--AGGTCAATTAAGTGAAACAACCTTTGAACCTGTTGATCTTGTCACAAATTAA | 216700  |

### vvl-37

|              |         |                                              |         |
|--------------|---------|----------------------------------------------|---------|
| <i>Cerat</i> | 459528  | GGTTCGTGGAAGTCTCGTGTTCAGCACACG-CGCGTAAATTTT  | 459570  |
| <i>Droso</i> | 6817479 | GTTTCGTGGAAGTCTCGTGTTCAGCACAC---CGCGTAAATTTT | 6817518 |
| <i>Musca</i> | 207477  | AGTTCGTGGAAGTCTCGTGTTCAGCACACGTCGCGTAAATTTT  | 207519  |

  

|              |         |                                                                            |         |
|--------------|---------|----------------------------------------------------------------------------|---------|
| <i>Cerat</i> | 459788  | TGGCGGCTCGCGCCTTTGTGTGCACATTTC-ATTCGCAACGCATTACACAAAACGGTACCGCTGGCGGCTA    | 459859  |
| <i>Droso</i> | 6817584 | GCGGCGGCATC-CACTTTGAGCCGCGTCCGCCATTTCGCAACGCATGCGCACAAAACGGTACCGCTAGCGGGTA | 6817655 |
| <i>Musca</i> | 207708  | GCGGCGGCATTCACTTTGTGTGCACATTTC-ATTCGCAATGCATTACACAAAACGGTACCGCTGATTTTTT    | 207779  |

### vvl-38

|              |         |                                                                |         |
|--------------|---------|----------------------------------------------------------------|---------|
| <i>Cerat</i> | 462472  | TTGATCGTGTGGAACGGCGAGCGCCCTTTTAAACAGCGCATAACAGCGAAATCATGACTTGC | 462534  |
| <i>Droso</i> | 6818852 | TTGATCGTGTGGAACGGCGAGCGCCCTTTTAAACAGCGCATAACAGCGAAATCATGACTTGC | 6818913 |
| <i>Musca</i> | 202227  | TCGATCGTGTGATCGGTGAGCGCCCTTTT-----TAACAGCAAAATCATGACTCAA       | 202175  |

|              |         |                                        |         |
|--------------|---------|----------------------------------------|---------|
| <i>Cerat</i> | 462706  | AAATAATGAAAAATTATTCAATAAAAAATTATTTCTG  | 462741  |
| <i>Droso</i> | 6819085 | AAATAATGAAAAATTATTCAATAAAAAATTATTTCTGA | 6819120 |
| <i>Musca</i> | 201657  | AAATAATGAAAAATTATTCAATAAAAAATTATTTTGA  | 201626  |

### vvl-49

|              |         |                                       |         |
|--------------|---------|---------------------------------------|---------|
| <i>Cerat</i> | 512064  | GCATTAACCGGAAGCCTTAGCCAAATGTGAACGTGAT | 512028  |
| <i>Droso</i> | 6834923 | GCATTAACCGGAAGCCTGCGCCAAACGTGATCAACGG | 6834961 |
| <i>Musca</i> | 105415  | GTACGAACCGGAAGCCTTCGCCAAACGTGATCTACGG | 105385  |

### vvl-51

|              |         |                                                       |         |
|--------------|---------|-------------------------------------------------------|---------|
| <i>Cerat</i> | 517380  | CTTTGTGGTTCAATAAACCATAAAAAGCTCATTAAATTATGCGCGCATATCGC | 517429  |
| <i>Droso</i> | 6837429 | TTTTGCGTTCAATAAACCATAAAAAGCTCATTAAATTAT--GCGCATATCGC  | 6837478 |
| <i>Musca</i> | 95350   | TTTTGCGTTCAATAAACCATAAAAAGCTCATTAAATTAT--GCGCGTATCTA  | 95397   |

### vvl-53

|              |         |                                           |         |
|--------------|---------|-------------------------------------------|---------|
| <i>Cerat</i> | 521195  | TGATTGACGCGATCATGATTTACACCTT--TGGGTGCGTA  | 521232  |
| <i>Droso</i> | 6839061 | TGATTGACATGATCATGATTTACACCTTTCTGGGTGCGTA  | 6839100 |
| <i>Musca</i> | 89266   | TGATTGACATGATCGTGATTTACACCATCCCTCTGTGTGTT | 89291   |

## Supplemental Figure S2

**A**

```
tatttgagggcgcgagggaatttctttcaacgaggggatcccgccgatccccccgcaaaaaacaagaaa
cacgcaaattgccgtcgcaaaaacacacagaatatattgcattatatattaacaatataatttggtcatc
tcTAGTaaagTAGTATGTAGAAGCAGCTGTGATAAATAGTGCATATTATACGAAaaaaGCAAAAAAGT
ATACGACAACAAataaaaattaaaAgcAAccacAActactactataAAAataaccaaggaaaaggcaagg
aaactcgcaaaacgagagagagagggaaaaagggaaaaaacgcCATGGATTTTATGACAAACAACAAatgcaacc
cagtaacaaatgatgttgagCAACtactacaatacacgagtataccaagaacatcaACAACaaCAActgC
AACGGCAACcAAcAACAAATTGTATACGATTTTTATAAACCAACAAAtgcTATGTAAATAaTtTtatAA
CAaacacacaagtaAAAAaaacAAtcAAAAccAGATCTCCCGCTctagaaaacaaacAAcaAACGCGCGG
TAACaaaaacgACAACA CAACAACAACAAGtACaAacgtaataATAATAcATAAAcTCTAACAA
TGTGCCTGTGTTAAAA AAAA AAagcaAAAtcAAGaagcaagcgttcaaaaagcaaaaggcttcccaata
catgaaaaaagtgcacaaacatatataaaaaatccaagaaaataacatccaaaactgaagaactggaaaagcc
aagagtaaatctaaggactccacacgggcagctacagtagagcttccctaaaaccgaagcagttgcagcgg
cggagcgggacgtcgggtcagtggtgttgcccccatttggtgttcctACtgtaAAAAGTGGCACAATCGG
GTTAGACGTCGCTCCAGAGCATTAAATGGCTCAGCCcAGGGTAAGTAgatccaccaagttcactttctaa
atatatagaatccatatagaatgggtcccccagagagtgtgttatccttaacaagttccgcagcgctaaaaa
```

**B**

|                |                                                                       |          |
|----------------|-----------------------------------------------------------------------|----------|
| Cerat 387653   | GTGAAGAAGCTGTGAT-ATTTGTGAGCATAT                                       | 387626   |
|                |                                                                       |          |
| Droso 10613790 | GTAGAAGCAGCTGTGATAAATAGTGCATAT                                        | 10613756 |
|                |                                                                       |          |
| Droso 10613564 | CATGGATTTATGAC                                                        | 10613577 |
|                |                                                                       |          |
| Musca 35636    | CATGGATTTATGAC                                                        | 35649    |
|                |                                                                       |          |
| Cerat 386904   | TCAAAACACATATACAAGCATTGTATACGATTTT---AAAGCAACAAAAT--TAT-TAAATTATT     | 386865   |
|                |                                                                       |          |
| Droso 10613458 | CAACGGCAACcAAcAACAA-ATTGTATACGATTTTT-AATAACCAACCAAAAtgcTATGTAAATAaTt  | 10613522 |
|                |                                                                       |          |
| Musca 35742    | CAACAACAACCA-CAACAAAATTGTATACGATTTTTTCTAAAACAAAATATAATAATTAA--AATT    | 35805    |
|                |                                                                       |          |
| Cerat 386251   | AAAAGTGGCACA-GGTCGGGCTGGACATCGCTCCAGAGCATTAAATGGCTCAACCTAGGGTAAGTACAT | 386184   |
|                |                                                                       |          |
| Droso 10613042 | AAAAGTGGCACA-AATCGGGTTAGACGTCGCTCCAGAGCATTAAATGGCTCAGCCcAGGGTAAGTAgat | 10612975 |
|                |                                                                       |          |
| Musca 383950   | AAAAGTGGCACAATCGGGTTGGACACCGCTCCTAGAGCATTAAATGGCTCAACCTAGGGTAAGTATTG  | 384012   |
|                |                                                                       |          |

### Supplemental Figure S3

#### *Anopheles gambiae*

Composite eBLAT

| Score                    | Start | End  |
|--------------------------|-------|------|
| 1420                     | 1     | 1420 |
| 87                       | 15    | 992  |
| 77                       | 332   | 1061 |
| Selected for EvoPrinting |       |      |

#### *Anopheles gambiae-SI*

Composite eBLAT

| Score                                                                                 | Start | End  |
|---------------------------------------------------------------------------------------|-------|------|
| 1405                                                                                  | 1     | 1420 |
| 84                                                                                    | 916   | 1172 |
| 80                                                                                    | 376   | 1118 |
| <input checked="" type="radio"/> 1 <sup>st</sup> <input type="radio"/> All Alignments |       |      |

#### *Anopheles melas*

Composite eBLAT

| Score                                                                                 | Start | End  |
|---------------------------------------------------------------------------------------|-------|------|
| 1374                                                                                  | 1     | 1420 |
| 73                                                                                    | 322   | 517  |
| 50                                                                                    | 332   | 484  |
| <input checked="" type="radio"/> 1 <sup>st</sup> <input type="radio"/> All Alignments |       |      |

#### *Anopheles merus*

Composite eBLAT

| Score                                                                                 | Start | End  |
|---------------------------------------------------------------------------------------|-------|------|
| 1357                                                                                  | 1     | 1420 |
| 76                                                                                    | 332   | 1065 |
| 87                                                                                    | 341   | 965  |
| <input checked="" type="radio"/> 1 <sup>st</sup> <input type="radio"/> All Alignments |       |      |

#### *Anopheles christyi*

Composite eBLAT

| Score                                                                                 | Start | End  |
|---------------------------------------------------------------------------------------|-------|------|
| 940                                                                                   | 50    | 1390 |
| 75                                                                                    | 50    | 168  |
| 92                                                                                    | 286   | 507  |
| <input checked="" type="radio"/> 1 <sup>st</sup> <input type="radio"/> All Alignments |       |      |

#### *Anopheles epiroticus*

Composite eBLAT

| Score                                                                                 | Start | End  |
|---------------------------------------------------------------------------------------|-------|------|
| 733                                                                                   | 107   | 1266 |
| 123                                                                                   | 234   | 1414 |
| 84                                                                                    | 329   | 716  |
| <input checked="" type="radio"/> 1 <sup>st</sup> <input type="radio"/> All Alignments |       |      |

#### *Anopheles culicifacies*

Composite eBLAT

| Score                                                                                 | Start | End  |
|---------------------------------------------------------------------------------------|-------|------|
| 535                                                                                   | 137   | 1382 |
| 105                                                                                   | 476   | 953  |
| 86                                                                                    | 332   | 429  |
| <input checked="" type="radio"/> 1 <sup>st</sup> <input type="radio"/> All Alignments |       |      |

#### *Anopheles funestus*

Composite eBLAT

| Score                                                                                 | Start | End  |
|---------------------------------------------------------------------------------------|-------|------|
| 534                                                                                   | 137   | 1384 |
| 131                                                                                   | 285   | 974  |
| 99                                                                                    | 33    | 356  |
| <input checked="" type="radio"/> 1 <sup>st</sup> <input type="radio"/> All Alignments |       |      |

#### *Anopheles dirus*

Composite eBLAT

| Score                                                                                 | Start | End  |
|---------------------------------------------------------------------------------------|-------|------|
| 447                                                                                   | 145   | 1265 |
| 86                                                                                    | 522   | 1028 |
| 101                                                                                   | 2     | 903  |
| <input checked="" type="radio"/> 1 <sup>st</sup> <input type="radio"/> All Alignments |       |      |

#### *Anopheles farauti*

Composite eBLAT

| Score                                                                                 | Start | End  |
|---------------------------------------------------------------------------------------|-------|------|
| 413                                                                                   | 145   | 1172 |
| 85                                                                                    | 7     | 531  |
| 84                                                                                    | 5     | 300  |
| <input checked="" type="radio"/> 1 <sup>st</sup> <input type="radio"/> All Alignments |       |      |

#### *Culex pipiens*

Composite eBLAT

| Score                                                                                 | Start | End  |
|---------------------------------------------------------------------------------------|-------|------|
| 204                                                                                   | 44    | 1172 |
| 109                                                                                   | 31    | 578  |
| 85                                                                                    | 44    | 922  |
| <input checked="" type="radio"/> 1 <sup>st</sup> <input type="radio"/> All Alignments |       |      |

#### *Aedes aegypti*

Composite eBLAT

| Score                                                                                 | Start | End  |
|---------------------------------------------------------------------------------------|-------|------|
| 181                                                                                   | 245   | 824  |
| 172                                                                                   | 245   | 824  |
| 71                                                                                    | 761   | 1055 |
| <input checked="" type="radio"/> 1 <sup>st</sup> <input type="radio"/> All Alignments |       |      |



## Supplemental Figure S4

**A**

| <i>Apis_Mellifera</i> (Bee) (Ref Sequence) | <i>Apis_dorsata</i> (Bee)                                                                                        | <i>Apis_Florea</i> (Bee)                                                                                         | <i>Bombus_Terrestrialis</i> (Bee)                                                                                |
|--------------------------------------------|------------------------------------------------------------------------------------------------------------------|------------------------------------------------------------------------------------------------------------------|------------------------------------------------------------------------------------------------------------------|
| Composite eBLAT                            | Composite eBLAT                                                                                                  | Composite eBLAT                                                                                                  | Composite eBLAT                                                                                                  |
| <b>Score Start End</b>                     | <b>Score Start End</b>                                                                                           | <b>Score Start End</b>                                                                                           | <b>Score Start End</b>                                                                                           |
| 2808 1 2808                                | 2388 76 2788                                                                                                     | 2299 61 2808                                                                                                     | 917 261 2497                                                                                                     |
| 322 717 1780                               | 284 700 1654                                                                                                     | 253 1143 1826                                                                                                    | 127 881 1800                                                                                                     |
| 227 438 1652                               | 245 1223 1796                                                                                                    | 195 968 1853                                                                                                     | 122 1305 1985                                                                                                    |
| Selected for EvoPrinting                   | <input checked="" type="radio"/> 1 <sup>st</sup> <input type="radio"/> All Alignments <input type="radio"/> None | <input checked="" type="radio"/> 1 <sup>st</sup> <input type="radio"/> All Alignments <input type="radio"/> None | <input checked="" type="radio"/> 1 <sup>st</sup> <input type="radio"/> All Alignments <input type="radio"/> None |

  

| <i>Bombus_Impatiens</i> (Bee)                                                                                    | <i>Habropoda_Laboriosa</i> (Bee)                                                                                 | <i>Megachile_Rotundata</i> (Bee)                                                                                 |
|------------------------------------------------------------------------------------------------------------------|------------------------------------------------------------------------------------------------------------------|------------------------------------------------------------------------------------------------------------------|
| Composite eBLAT                                                                                                  | Composite eBLAT                                                                                                  | Composite eBLAT                                                                                                  |
| <b>Score Start End</b>                                                                                           | <b>Score Start End</b>                                                                                           | <b>Score Start End</b>                                                                                           |
| 860 261 2462                                                                                                     | 762 287 2453                                                                                                     | 307 2070 2450                                                                                                    |
| 196 481 1806                                                                                                     | 259 681 1810                                                                                                     | 119 1589 1798                                                                                                    |
| 159 677 1811                                                                                                     | 142 1140 1947                                                                                                    | 127 1705 1894                                                                                                    |
| <input checked="" type="radio"/> 1 <sup>st</sup> <input type="radio"/> All Alignments <input type="radio"/> None | <input checked="" type="radio"/> 1 <sup>st</sup> <input type="radio"/> All Alignments <input type="radio"/> None | <input checked="" type="radio"/> 1 <sup>st</sup> <input type="radio"/> All Alignments <input type="radio"/> None |

**B**

aaaacggttatatatatttattatatgtataatattttgaatagtgttttgtgacagtcacatgacaatcattgacta  
ttatatatatataactcaaatcatcaagttatatttgagagttcaagacaactcgttgataatatatatccaa  
tactatcgttagcgatatatttttcgataatcgttaataattcattgacaaagttgtgaagcaataattttta  
caaaagttttttgaaattatctaaaatcgattgatctctggaacaccctatatatatcttgttgtatgttctcg  
**TTAAT**ctatcc**CT**atata**TACATCTATCAGGATCAGCCGCAATTAATTC**cacacg**CATATTTCATCC**gtg  
cgaat**GT**acacatttt**ACAC**aaggattaccgcatgtccactgtctcgaattcttcgacaagcaacgattttt  
tccaaagaggattggcgacattttatag**CTCGAAATGTGCGCGA**AAAC**GAGCGAGAAAGTTTAAATTGC**tc  
**CGC**gt**ACGAGC****CA**CC**ATGAATC****TCTTGT**gcg**ACGATATTGTTTAA**atac**AC**accttcg**AAAGGTT**tc  
a**TGCTTACACTCGTTAAA**agtgcagacatgtgcaga**GACA**AAACgggtgtatcga**TACAATCGGTTCCCG**  
**TTTCATTGTT**ccgaacatacaaacacattgttagatttcttcttttttttttttttttttttttttttttttttt  
**TCT**ttc**TCT**tttttttttttttttttttttttttttttttttttttttttttttttttttttttttttttttttt  
taccgt**GAA**cagagcg**GAAAAAGTTTAAATGGAGCGC**gt**AATTTAAC**ggt**CGCGATTAAATGAAAGTG**  
tt**CGTTT**gggtcggttt**TT**tttt**CAGAGAAATCGACAG**AAAT**TG**tat**GATTAATGCTCGAATT**cg**AA**tga**CA**  
a**ATAAT**gtaaaaggattcatgtaattgttttttttttttttttttttttttttttttttttttttttttttttt  
tttcagttttgcaacagaatgaatcatttcaaacgtgaaatagaatatttttacaatatcgtttttgttttgact  
atttttgtttattttctcttttttttttttttttttttttttttttttttttttttttttttttttttttttttt  
tttttgaaaaatattttacgtatttttttttttttttttttttttttttttttttttttttttttttttttttt  
tttttatataattttatcatgtaaaacatttagtatttttaatttgcaattataacatatcaaaatattgtaaaagta  
tataaaagtttttattagtttttacatatttaattattatgcaaatttttatctattttatttaagtttagttttcattc  
atctttccaatataattgtaaaaatttttttttttttttttttttttttttttttttttttttttttttttttttt  
aatattttctttatcattataatttctaaaaatttttttttttttttttttttttttttttttttttttttttttt  
ttattttatacaaatattttataacttttttttttttttttttttttttttttttttttttttttttttttttttttt  
cattttttctcattttattaaatatatgtttttgttttaaaacagtttaacatttttttttttttttttttttttttttt  
atcaacaaattcgaagatatttggaataataatttttttttttttttttttttttttttttttttttttttttttttt  
atattttcaattttactttataaatatatatatatacatactctttactatatatacatactttatatattttataaa  
atatgatctattttcgatcactatttctaaaaaaattaaagaaaaataataaaaaaaaaggaaaaacaacaatc  
taatttagaaatgaacaacaatctaacaacaacaattgaatacaaaaactcatatttcttttcttttttttttttttt  
ttatttaattgaaaacgcatacacaaaatattttacaaattctactcacgtaaatcaaccttgaaacgcgacgat  
tcgtacatgatataaaattttcacaggcgcgctc**TATTTCT****CGCGC**ct**AATAATATTA**caa**CGCCTTTGT**  
**TC****CC**ttcagtgagta**CTATATTTCTAGCGTAACATATCCATCTTACTAATAGCGC**ATGGTCAGACTG  
**CACGTAATTCGAGGAGTC**accaacggttcccccgtgtgtatatatctcctgt**ATGTCA**tggtcgtatatgg  
ccccgt**TACATA****CG**gt**TATC****AT**g**TGGAATGATCCGA**ac**AGGCA**g**GGATAGGTAGAGCATCGAGT**  
**GT**g**ATACCGAAATACATAAC**ct**ATCCAAGCCGGCTGACTTGGCCGACAATCGTATTTAG**gaag**CCGCTTA**  
**TCTCAGCC****GTCTTAGCTG**at**CTAATGTCTC**ttgg**CGAAT****TGTT****A**cac**GTAGAG****G****AATAACGT**atac  
g**GA****T**cttagatagaaatgttgtgttttagaacgaagcaagaaaaaggaaaaactaaaagcgagaaagggaaga  
ggaaaaaaattgaagggtataaggaggtaaaaagaaaaatggcaagggtgaagagaaagtcgtgaggggaatg  
ggggtgagagtggtcgtgaaaatggaagaaattttggagcaaggatgataatacgaagagagaaagtgagaa  
ataggatagagcaagaggaggagtgagtaatatcatagaaagaataaagaatcaaggaaaggattaaaaaag  
atacaattttattggagagaaaaatattgaaaggattattgttttaaatattgtatagtttttatgtcaattttatt







**Cerapachys\_Biroi (Ant) *hth* Genomic Relaxed *EvoPrint***

[illegible]



**Supplemental Figure 1. Ultra-conserved DNA in *Drosophila vvl* enhancers identified in *Ceratitis capitata* and *Musca domestica* orthologous DNAs.**

Three-way *Ceratitis-Drosophila-Musca* BLASTn alignments of CSBs within six different *in vivo* tested *Drosophila vvl* enhancers. *Drosophila* sequences that are shared with *Ceratitis* and *Musca* are shown in green. Red bases are shared only between *Drosophila* and *Ceratitis* and blue text represent bases shared exclusively between *Drosophila* and *Musca*. Yellow highlighted *Ceratitis* and *Musca* bases are not shared in *Drosophila*. Flanking BLASTn designator numbers indicate genomic base positions.

**Supplemental Figure 2. Ultra-conserved *Drosophila*, *Ceratitis capitata* and *Musca domestica* sequences within the *homothorax locus*.**

**A)** A 1,065bp *EvoPrint* of the *D. melanogaster homothorax locus* that includes 5' non-transcribed sequence, its 5' UTR, the first five codons of its encoded protein and 102bp of the first intron. Capital letters represent bases in the *D. melanogaster* reference sequence that are conserved in *D. simulans*, *D. sechellia*, *D. yakuba*, *D. erecta*, *D. ananassae*, *D. persimilis*, *D. grimshawi*, *D. mojavensis* and *D. virilis* orthologous DNAs. Lower case grey letters represent bases that are not conserved in one or more than one of the test species. *Drosophila* CSBs that are shared with *Ceratitis* and *Musca*, as detected in figure 1, are shown in green. Red bases are shared only between *Drosophila* and *Ceratitis* and blue text represent bases shared exclusively between *Drosophila* and *Musca*. The translation start codon is marked by an underlined ATG. **B)** BLASTn two and three-way alignments of the ultra-conserved CSBs. Font color annotations are as in panel A. Yellow highlighted bases in *Ceratitis* and *Musca* are not shared in *Drosophila*. Flanking BLASTn designator numbers indicate genome base positions.

**Supplemental Figure 3. Combined Ant and Bee *EvoPrints* identify ultra-conserved *Hymenoptera* DNA**

**A)** An *Apis mellifera goosecoid (gsc)* *EvoPrint* generated with four evolutionary divergent bee genomes and then overlaid with a print that includes the four bee genomes plus four divergent ant species. The *Apis* honeybee *gsc* DNA (1,701 bp) includes 5' non-coding, the first exon and intron sequences. All uppercase bases (both black and red font) are conserved in bees and sequences that are conserved in both bees and ants are denoted with red-font uppercase bases. Lowercase gray-

colored bases are not conserved in one or more of the bee test genomes. Bee test genomes: *Bombus terrestris*, *Bombus impatiens*, *Habropoda laboriosa* and *Megachile rotundata*. Ant test genomes: *Linepithema humile*, *Monomorium pharaonis*, *Wasmannia auropunctata* and *Atta cephalotes*. **B)** *EvoPrints* of the ant *Wasmannia auropunctata castor* (*cas*) gene locus. The 3,078 bp *Wasmannia* genomic DNA includes *cas* 5' non-coding, the first exon and flanking intron genomic sequences. The initial *EvoPrint* was generated with four evolutionary divergent ants and then super-imposed with a print that included these four ants plus four bee genomes. All uppercase bases (both black and red font) are conserved in the ants *Cerapachys biroi*, *Linepithema humile*, *Atta cephalotes* and *Vollenhovia emeryi*. Sequences that is conserved in both ants and bees (*Apis florea*, *Bombus impatiens*, *Habropoda laboriosa* and *Megachile rotundata*) are shown as red colored uppercase bases. Lowercase gray-colored bases are not conserved in one or more of the ant test species. The translation initiation codon is underlined. The left flanking vertical brown bar indicates an ant-specific conserved DNA cluster that is not found in bees. Note, in the exon ORF most, but not all, of the conserved codons do not have conserved wobble positions indicating that the cumulative evolutionary divergence of the test species used to generate the *EvoPrint* afford near base pair resolution of essential DNA.

#### **Supplemental Figure 4. Conserved sequence clusters within the honeybee *dscam2* gene**

*EvoPrinter* analysis reveals *Apis mellifera* non-coding sequence elements that are conserved in other bee species or only in a subset of species. **A)** Alignment data generated from one-on-one comparisons of a 2.8 kb sequence from the honeybee 16 kb *dscam2* second intron. For each species, the top three independent eBLAT alignment scores are listed. Scores indicate the total number of bases within the reference sequence, the *Apis mellifera dscam2* intron, that align with the test species genome. The test species; *Apis dorsata*, *Apis florea*, *Bombus terrestris*, *Bombus impatiens*, *Habropoda laboriosa* and *Megachile rotundata* are listed (L -> R) based on their highest alignment score in descending order. Website links to individual eBLAT alignments and superimposed composite eBLATs are indicated in either red or blue font colors. As indicated in the alignment scorecard by the blue selection buttons, the top (highest scoring alignment) for each test species has been selected for *EvoPrinting*. **B)** A color-coded relaxed *EvoPrint* of the 2.8 kb honeybee *dscam2* second intron generated

from the alignment data shown in panel A. Black uppercase letters indicate bases conserved in all test species. Font colors represent sequences conserved in all species except for *Apis dorsata*, *Apis florea*, *Bombus terrestris*, *Bombus impatiens*, *Habropoda laboriosa* or *Megachile rotundata*. Gray lowercase nucleotides are not conserved in at least two of the test species.

### **Supplemental Figure 5. Combined Ant and Bee *EvoPrints* identify ultra-conserved *Hymenoptera* DNA**

**A)** An *Apis mellifera* *goosecoid* (*gsc*) *EvoPrint* generated with four evolutionary divergent bee genomes and then overlaid with a print that includes the four bee genomes overlaid with an *EvoPrint* that includes four divergent ant species. The *Apis* honeybee *gsc* DNA (1,701 bp) includes 5' non-coding, the first exon and intron sequences. All uppercase bases (both black and red font) are conserved in bees and sequences that are conserved in both bees and ants are denoted with red-font uppercase bases. Lowercase gray-colored bases are not conserved in one or more of the bee test genomes. Bee test genomes: *Bombus terrestris*, *Bombus impatiens*, *Habropoda laboriosa* and *Megachile rotundata*. Ant test genomes: *Linepithema humile*, *Monomorium pharaonis*, *Wasmannia auropunctata* and *Atta cephalotes*. **B)** *EvoPrints* of the ant *Wasmannia auropunctata castor* (*cas*) gene locus. The 3,078 bp *Wasmannia* genomic DNA includes *cas* 5' non-coding, the first exon and flanking intron genomic sequences. The initial *EvoPrint* was generated with four evolutionary divergent ants and then super-imposed with a print that included these four ants plus four bee genomes. All uppercase bases (both black and red font) are conserved in the ants *Cerapachys biroi*, *Linepithema humile*, *Atta cephalotes* and *Vollenhovia emeryi*. Sequences that is conserved in both ants and bees (*Apis florea*, *Bombus impatiens*, *Habropoda laboriosa* and *Megachile rotundata*) are shown as red colored uppercase bases. Lowercase gray-colored bases are not conserved in one or more of the ant test species. The translation initiation codon is underlined. The left flanking vertical brown bar indicates an ant-specific conserved DNA cluster that is not found in bees. Note, in the exon ORF most, but not all, of the conserved codons do not have conserved wobble positions indicating that the cumulative evolutionary divergence of the test species used to generate the *EvoPrint* afford nearu base pair resolution of essential DNA.



**Supplemental Figure 6. Side-by-side comparison of conserved sequences within ant and bee *homothorax* loci identifies shared exon/intron architecture and species-specific conserved sequences.**

*EvoPrints* of bee and ant genomic DNA that includes *homothorax* (*hth*) encoding an exon isologous to the 2<sup>nd</sup> exon of *Drosophila hth* plus flanking intronic sequences. Blue and red underlined regions are coding and non-coding sequences, respectively, and align with homologous regions in the two panels. Black uppercase bases are conserved in all test species and colored uppercase bases are conserved in all but one of four bee tests species in panel A and all but one of three ant test species in panel B. **A)** Relaxed *EvoPrint* of *Apis mellifera* genomic sequences (6.3kb; Group5:7,111,526-7,117,900). Vertical red bars flanking the *EvoPrint* indicate conserved bee-specific sequences that are not found in ants. Colored uppercase bases are conserved in all but one of the color-coded test species: *Apis florea*, *Habropoda laboriosa*, *Bombus terrestris* and *Bombus impatiens*. **B)** Relaxed *EvoPrint* of *Cerapachys biroi* genomic DNA (5.1kb; 6532628-6527517, *Ooceraea biroi* isolate clonal line C1 chromosome 14, Obir\_v5.4). The green vertical bar flanking the *EvoPrint* indicates ant-specific conserved sequence that is absent in bees. Black uppercase bases are conserved in all test ant species and colored uppercase bases are conserved in all but one of the color-coded test species: *Monomorium pharaonis*, *Atta cephalotes*, *Vollenhovia emeryi*, *Acromyrmex echinator*, *Lasius niger*, *Pogonomyrmex barbatus*, *Wasmannia auropunctata*, *Cardiocondyla obscurior* or *Linepithema humile*.
